# Supplementary material for: ELAC2 Functions as a Key Gene in the Early Development of Placental Formation Based on WGCNA
Source: MDPI journal article supplement (doi:10.3390/cells12040613), 2023-02-14

**A.Detection of ELAC2 in HTR-8/Svneo cells of different treatment groups**

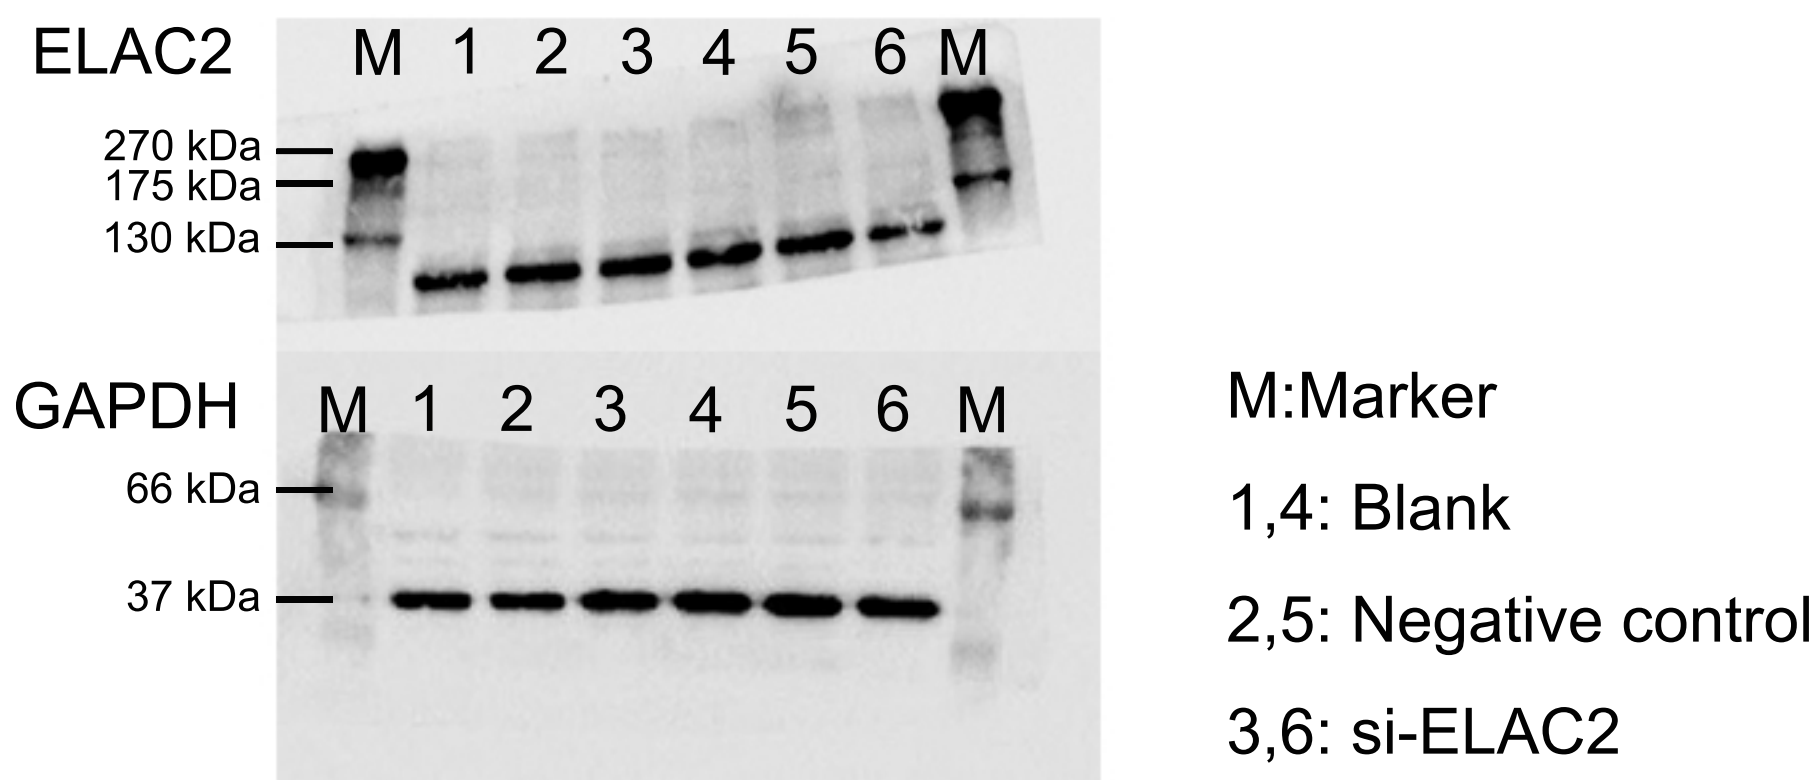

**B.Detection of Vimentin in HTR-8/Svneo cells of different treatment groups**

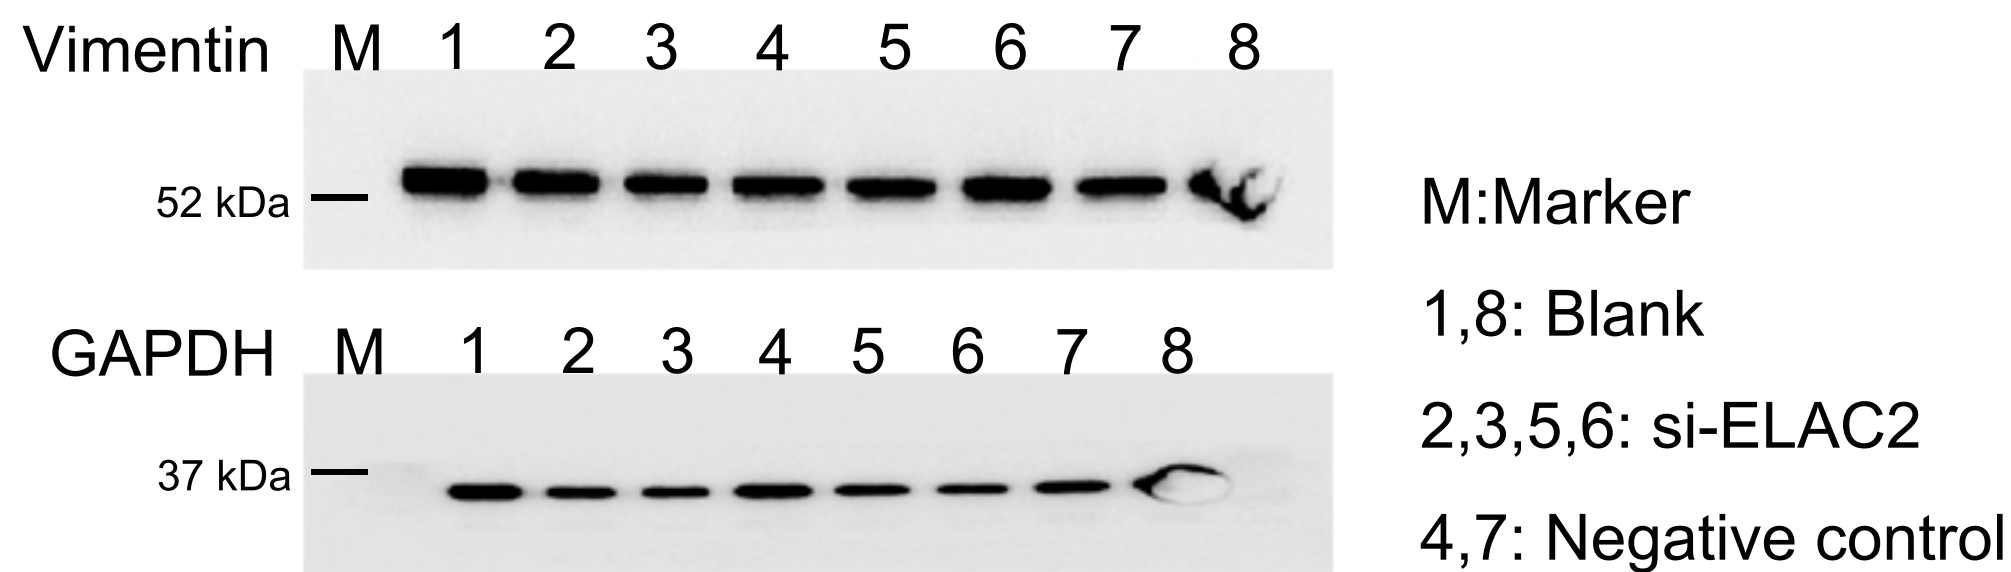

**C.Detection of E-cadherin in HTR-8/Svneo cells of different treatment groups**

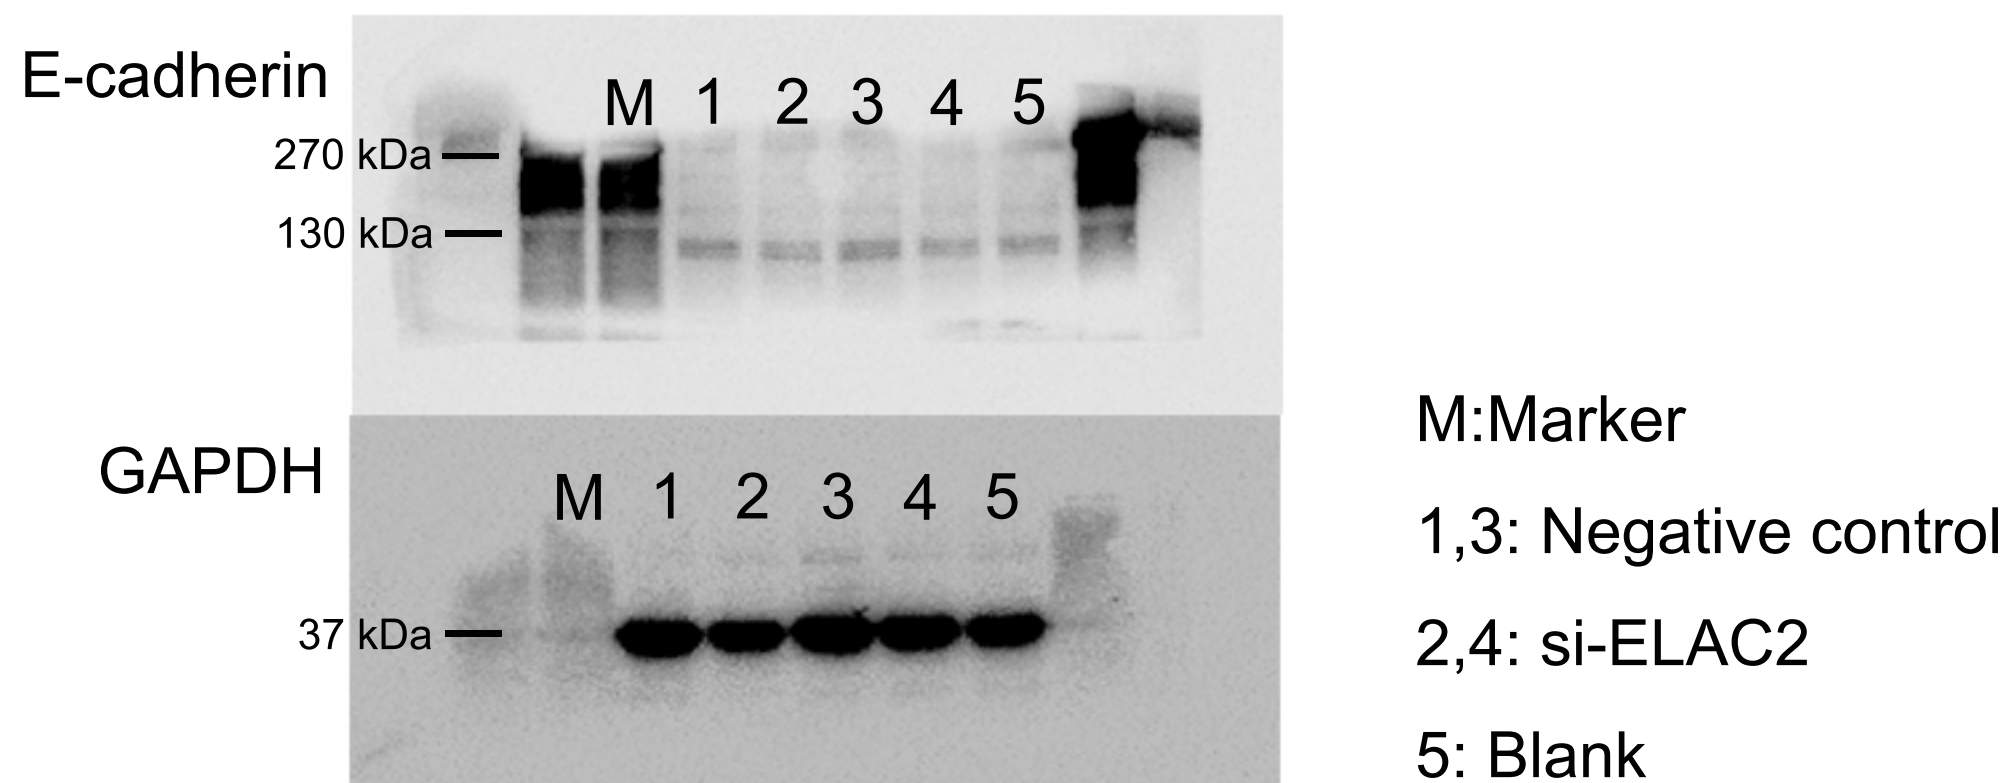

Supplement: s1 [file s1]
